# Supplementary material
Source: MDPI journal article supplement (https://www.mdpi.com/2077-0472/13/8/1642)
Supplement: s1 [file s1]

# Detection and Classification of Citrus Fruit Infestation by *Bactrocera dorsalis* (Hendel) Using a Multi-Path Vis/NIR Spectroscopy System

Dapeng Li <sup>1</sup>, Jiang Long <sup>1</sup>, Ziyi Tang <sup>1</sup>, Longbo Han <sup>1</sup>, Zhongliang Gong <sup>1</sup>, Liang Wen <sup>2</sup>, Hailong Peng <sup>3</sup> and Tao Wen <sup>1,\*</sup>

<sup>1</sup> School of Mechanical and Electrical Engineering, Central South University of Forestry and Technology, Changsha 410004, China; dapengli@csuft.edu.cn (D.L.); longjiang7577@163.com (J.L.); 13142186037@163.com (Z.T.); 18039962039@163.com (L.H.); gzlai@163.com (Z.G.)

<sup>2</sup> College of Life Sciences, South China Normal University, Guangzhou 510630, China; wen543981746@163.com

<sup>3</sup> Department of Chemical and Pharmaceutical Engineering, Nanchang University, Nanchang 330031, China; peng\_hailong@aliyun.com

\* Correspondence: twen@csuft.edu.cn.

## **Supporting Information**

**Figure S1.** Original spectra and MSC processed spectra under orientation A.

**Figure S2.** Original spectra and MSC processed spectra under orientation B.

**Figure S3.** Original spectra and MSC processed spectra under orientation C.

**Figure S4.** Original spectra and MSC processed spectra of the average spectra.

**Figure S5.** PLS-DA analysis results of four paths in orientation A. A Path 1, B Path 2, C Path 3, D Path 4.

**Figure S6.** PLS-DA analysis results of four paths in orientation B. A Path 1, B Path 2, C Path 3, D Path 4.

**Figure S7.** PLS-DA analysis results of four paths in orientation C. A Path 1, B Path 2, C Path 3, D Path 4.

**Figure S8.** Classification of citrus according to the stages of infestation in test set: confusion matrix of four light path spectra in orientation A.

**Figure S9.** Classification of citrus according to the stages of infestation in test set: confusion matrix of four light path spectra in orientation B.

**Figure S10.** Classification of citrus according to the stages of infestation in test set: confusion matrix of four light path spectra in orientation C.

**Figure S11.** PLS-DA test set results for average spectra of four paths in three fruit orientations. (A) orientations A, (B) orientations B, (C) orientations C.

**Figure S12.** The interface of the developed multi-path NIR spectroscopic system.

**Figure S13.** Scheme of the multi-path NIR spectroscopic system.

**Figure S14.** The developed multi-path NIR spectroscopic system control logic.

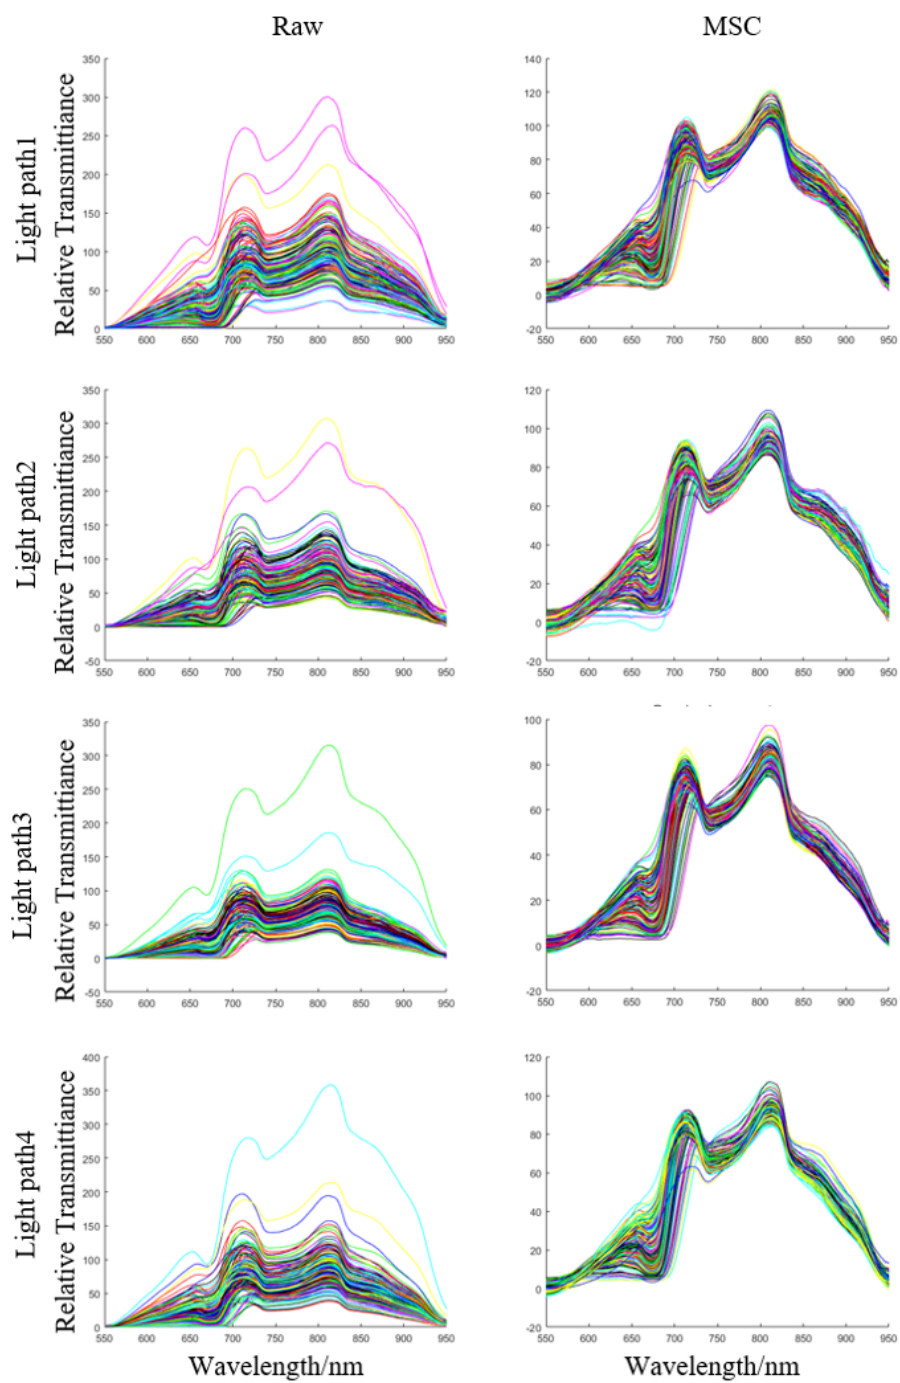

**Figure S1**

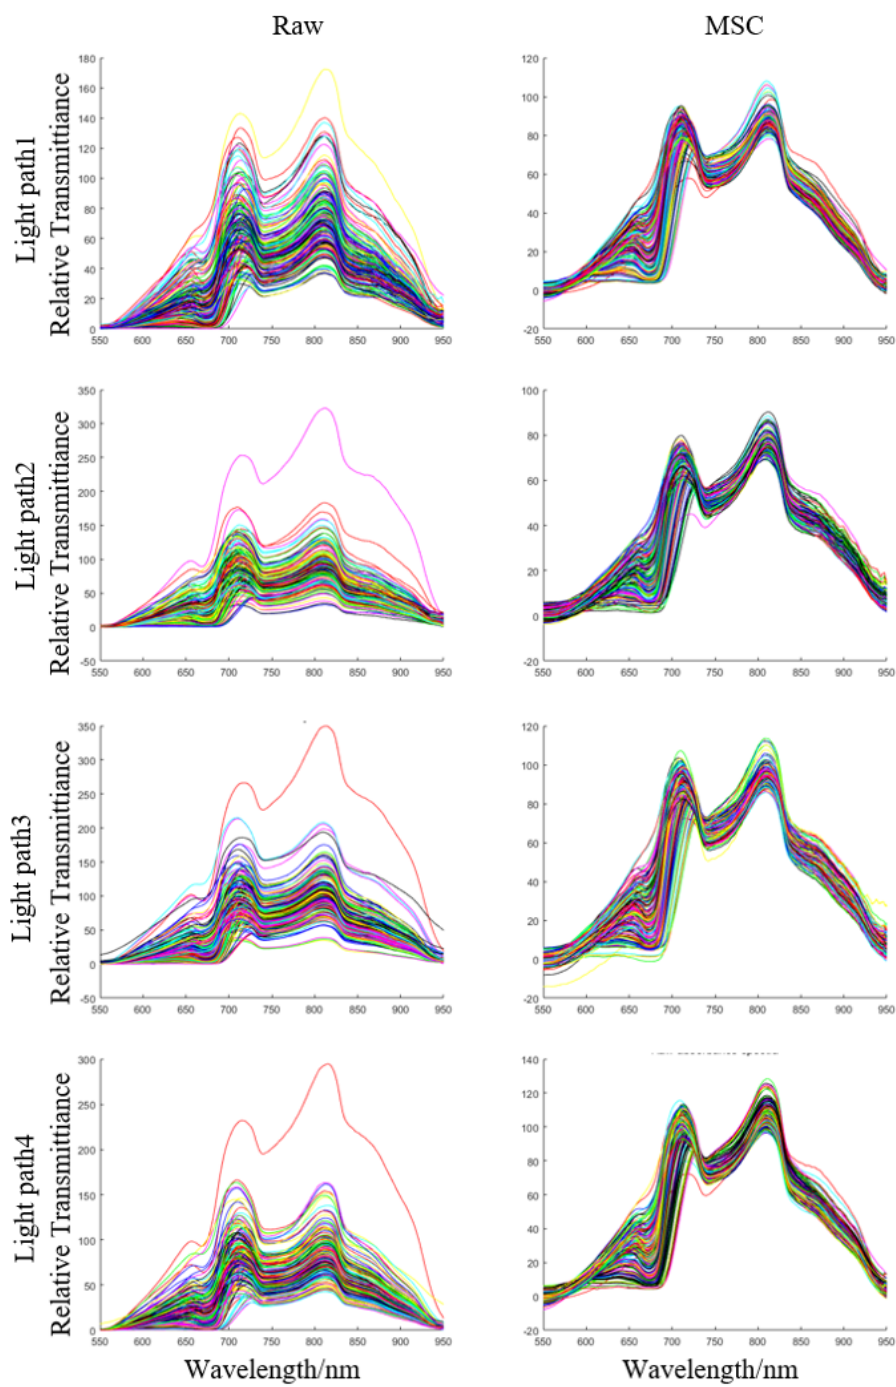

**Figure S2**

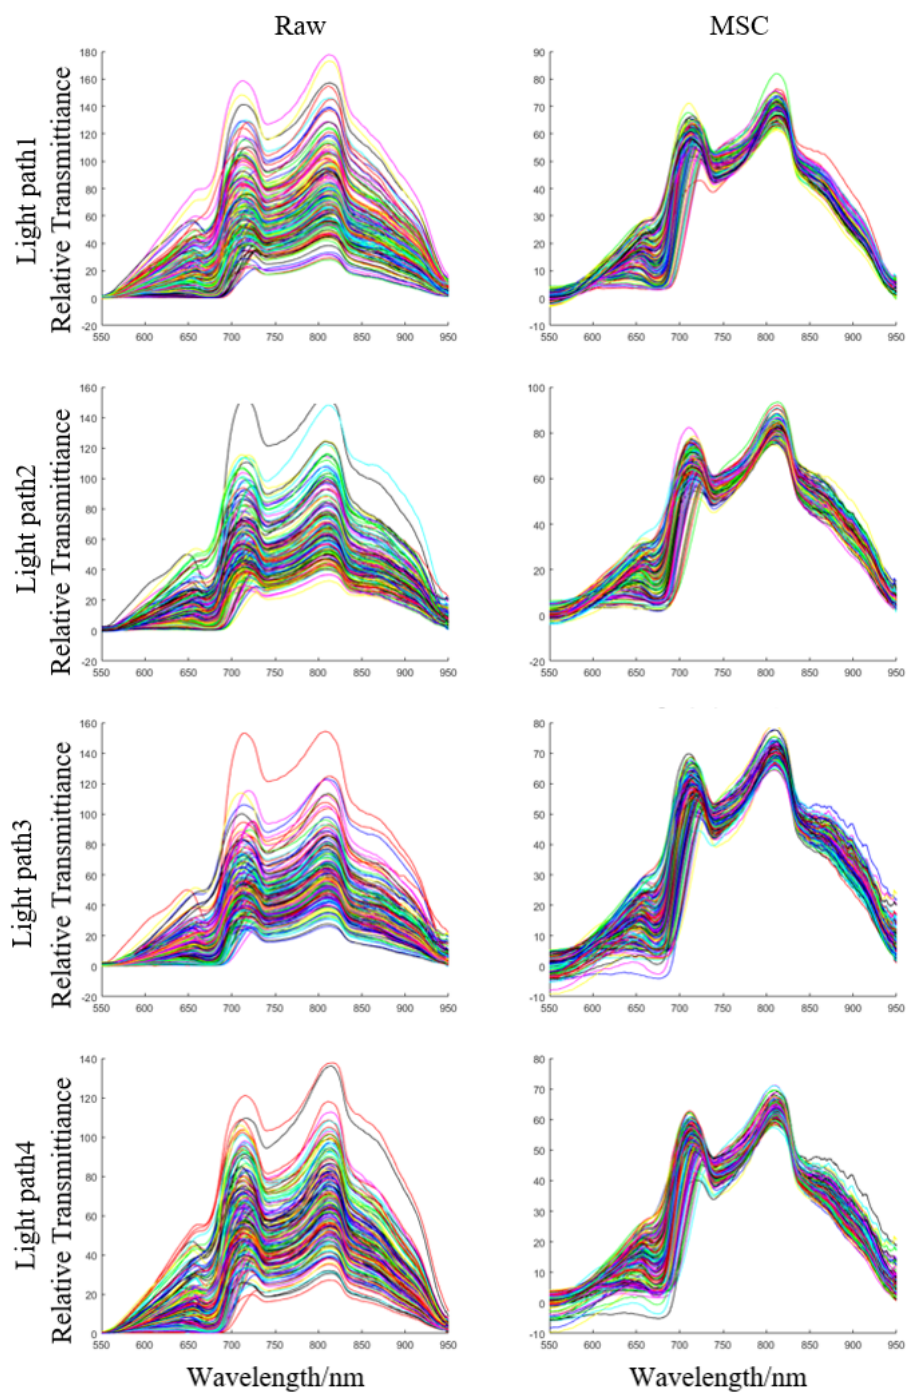

**Figure S3**

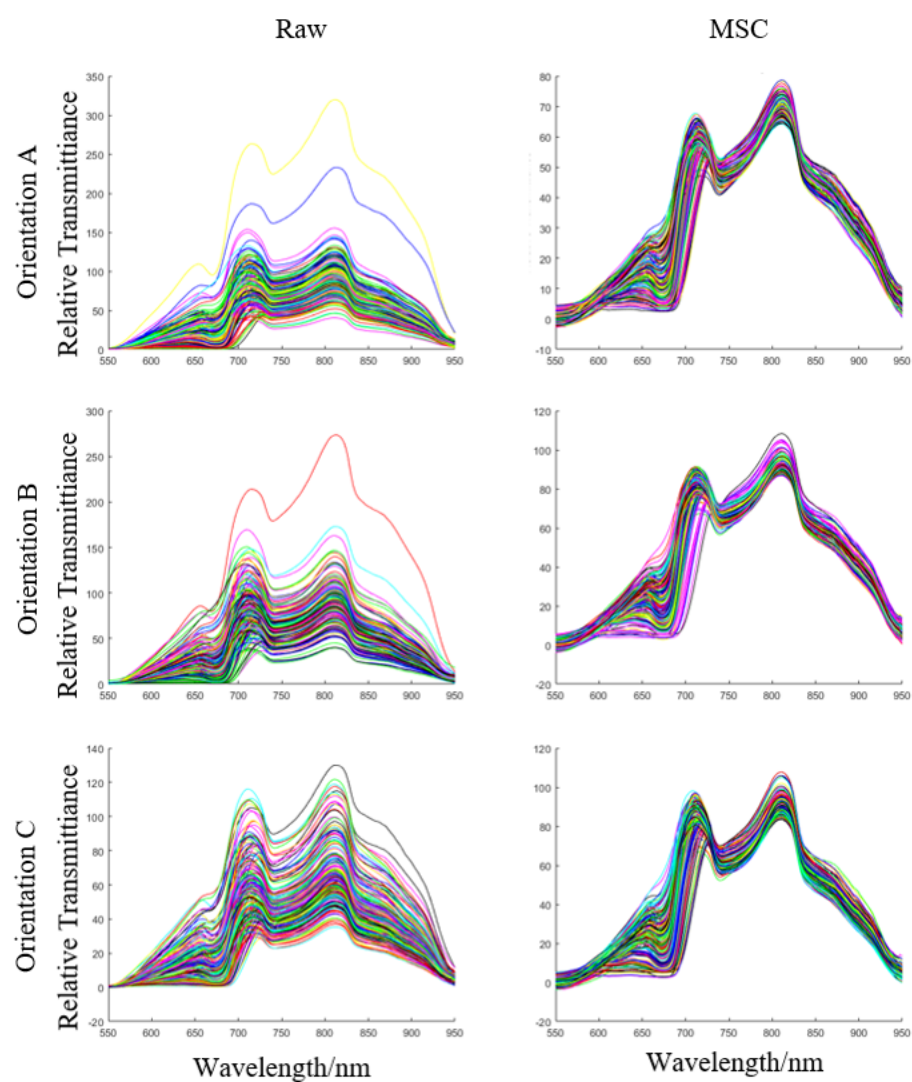

**Figure S4**

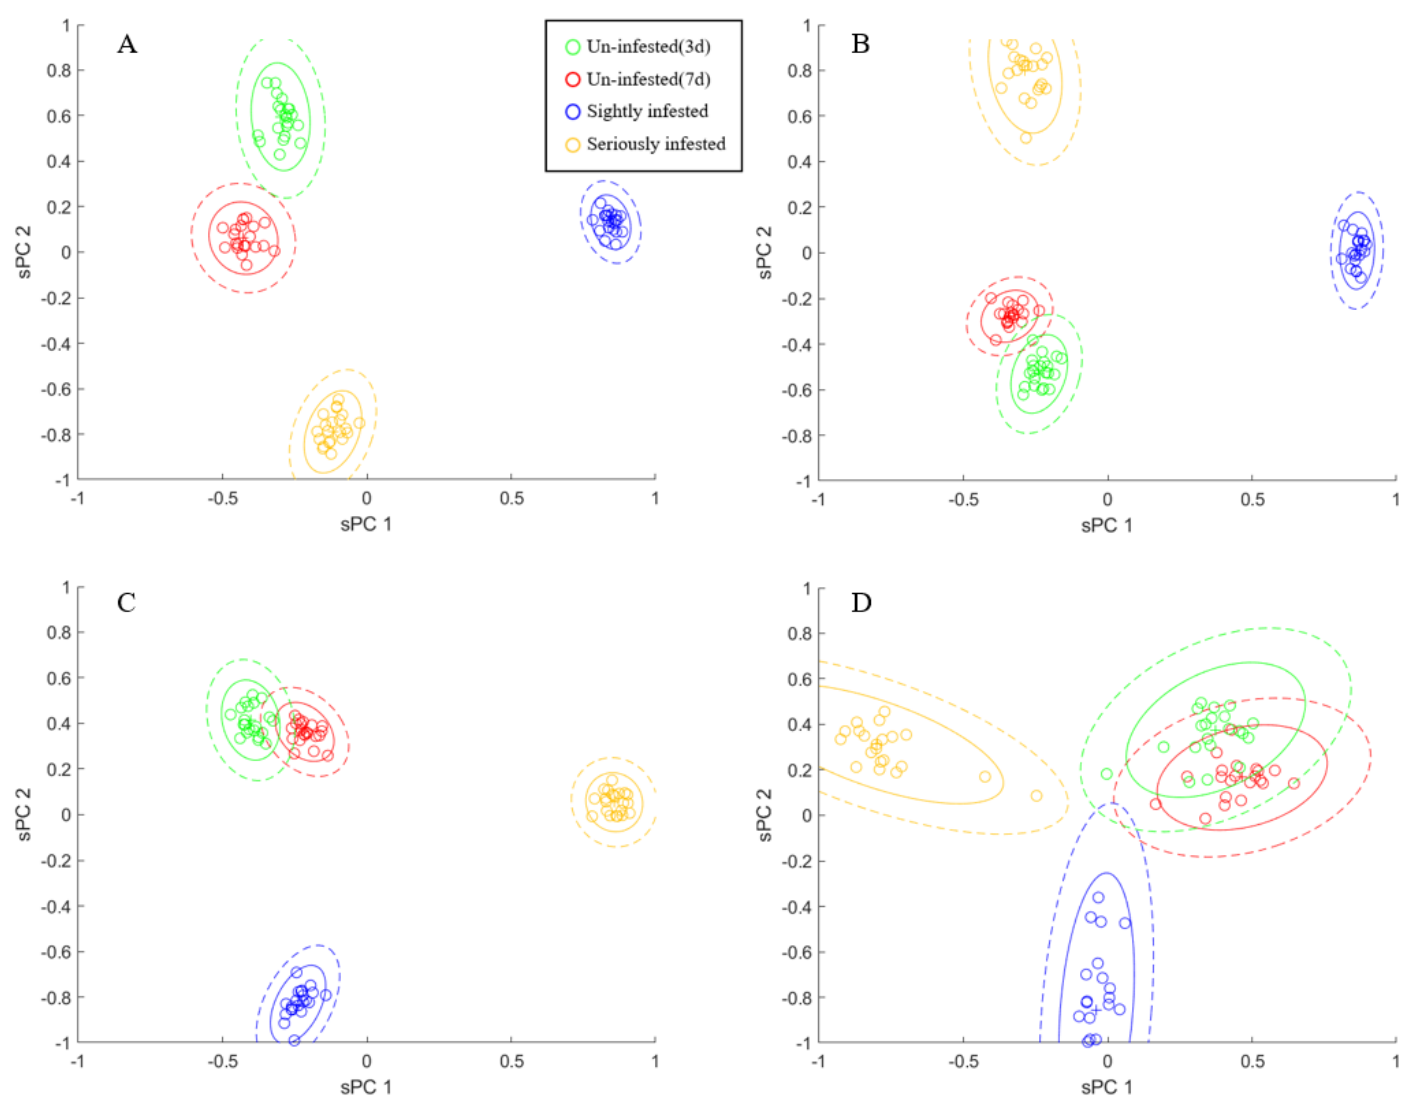

**Figure S5**

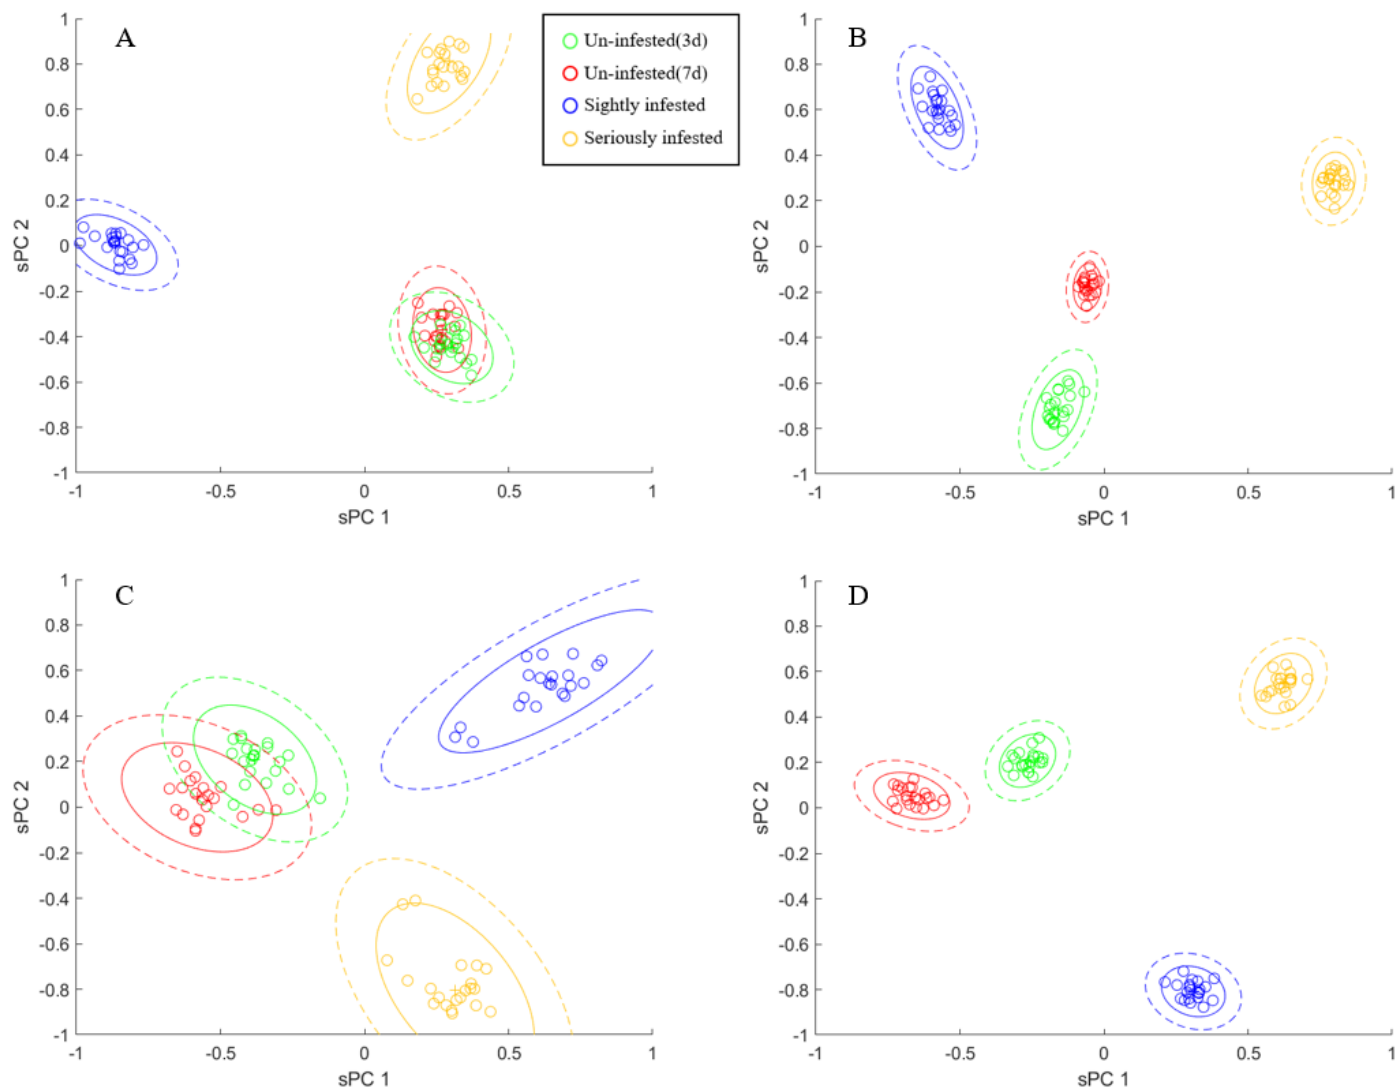

**Figure S6**



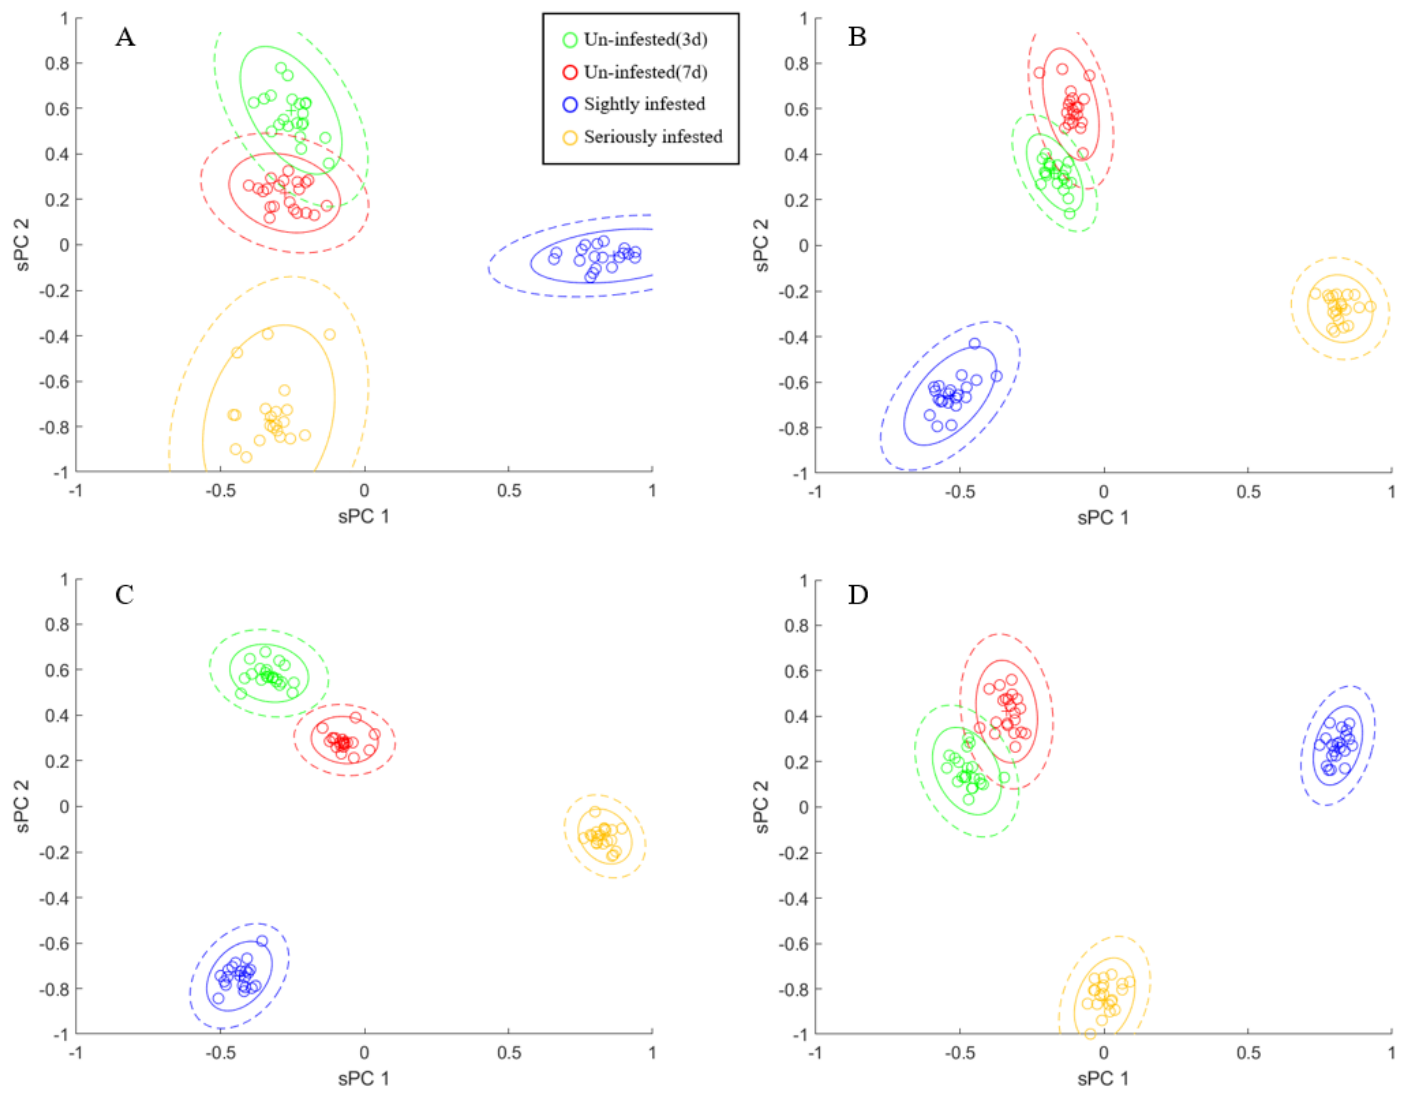

Figure S7

## Orientation A

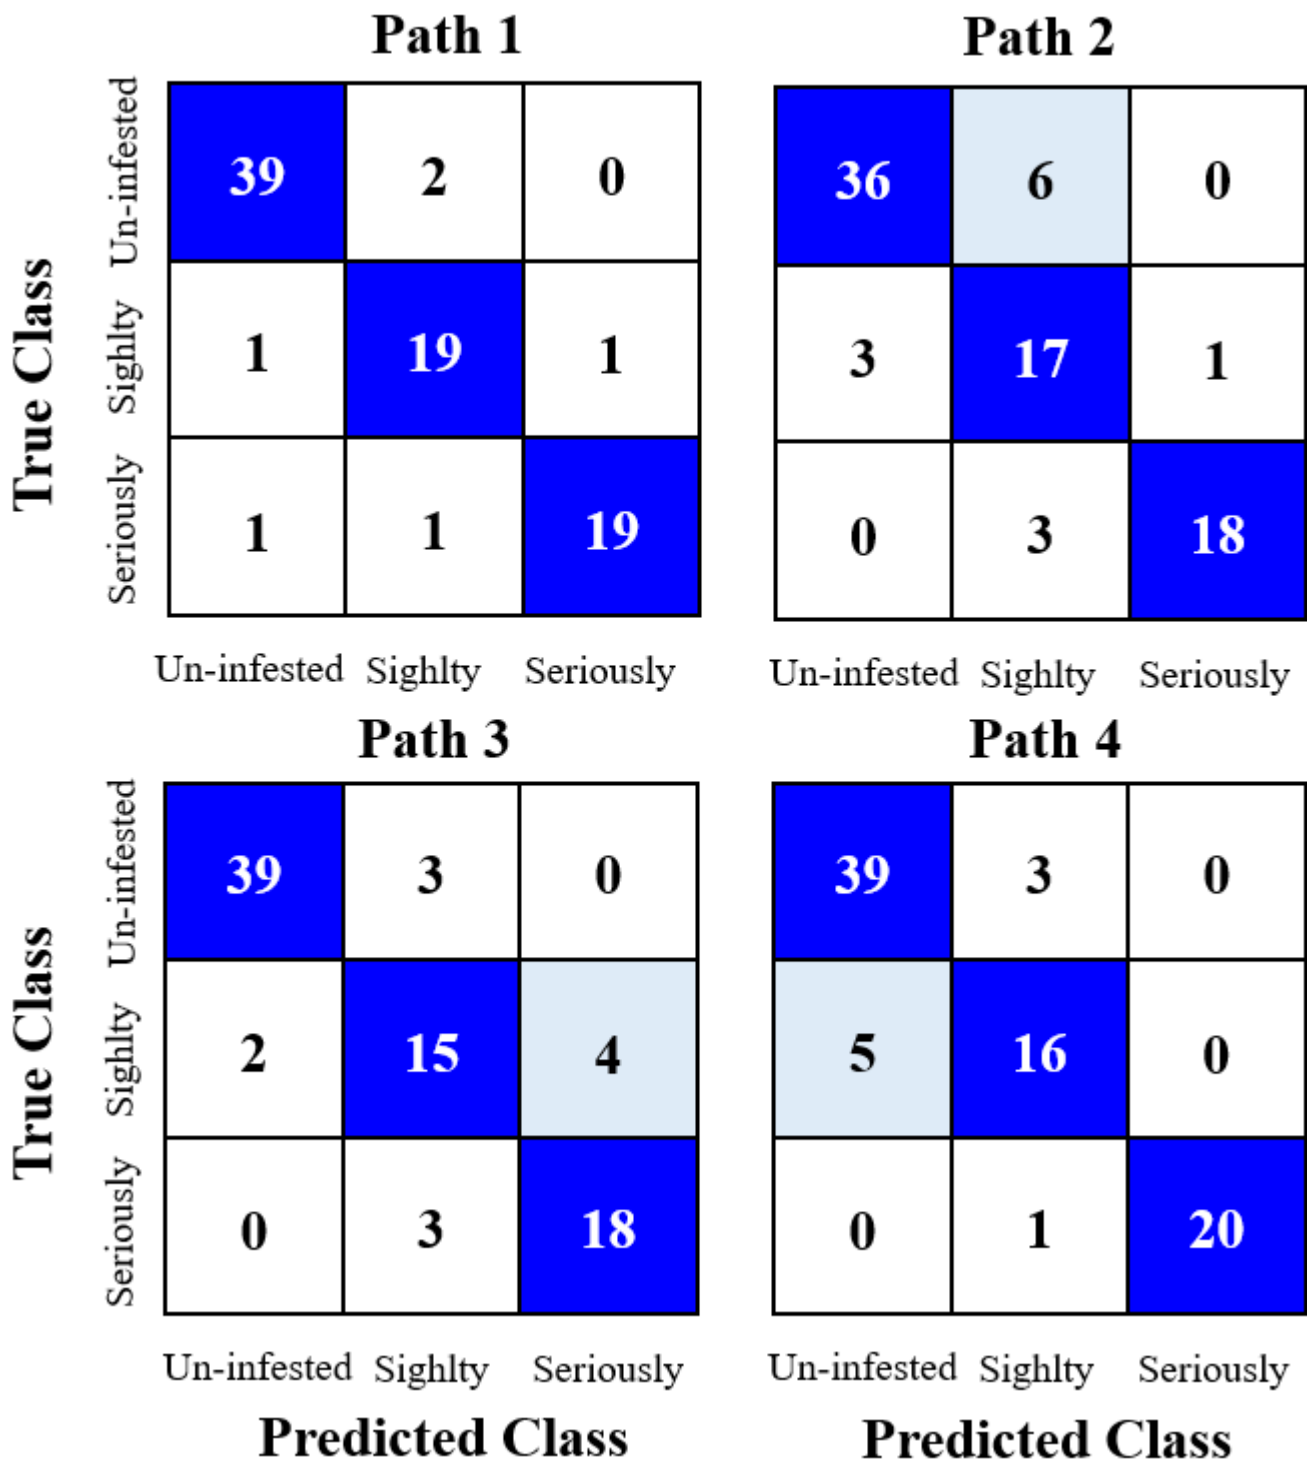

Figure S8

**Orientation B**

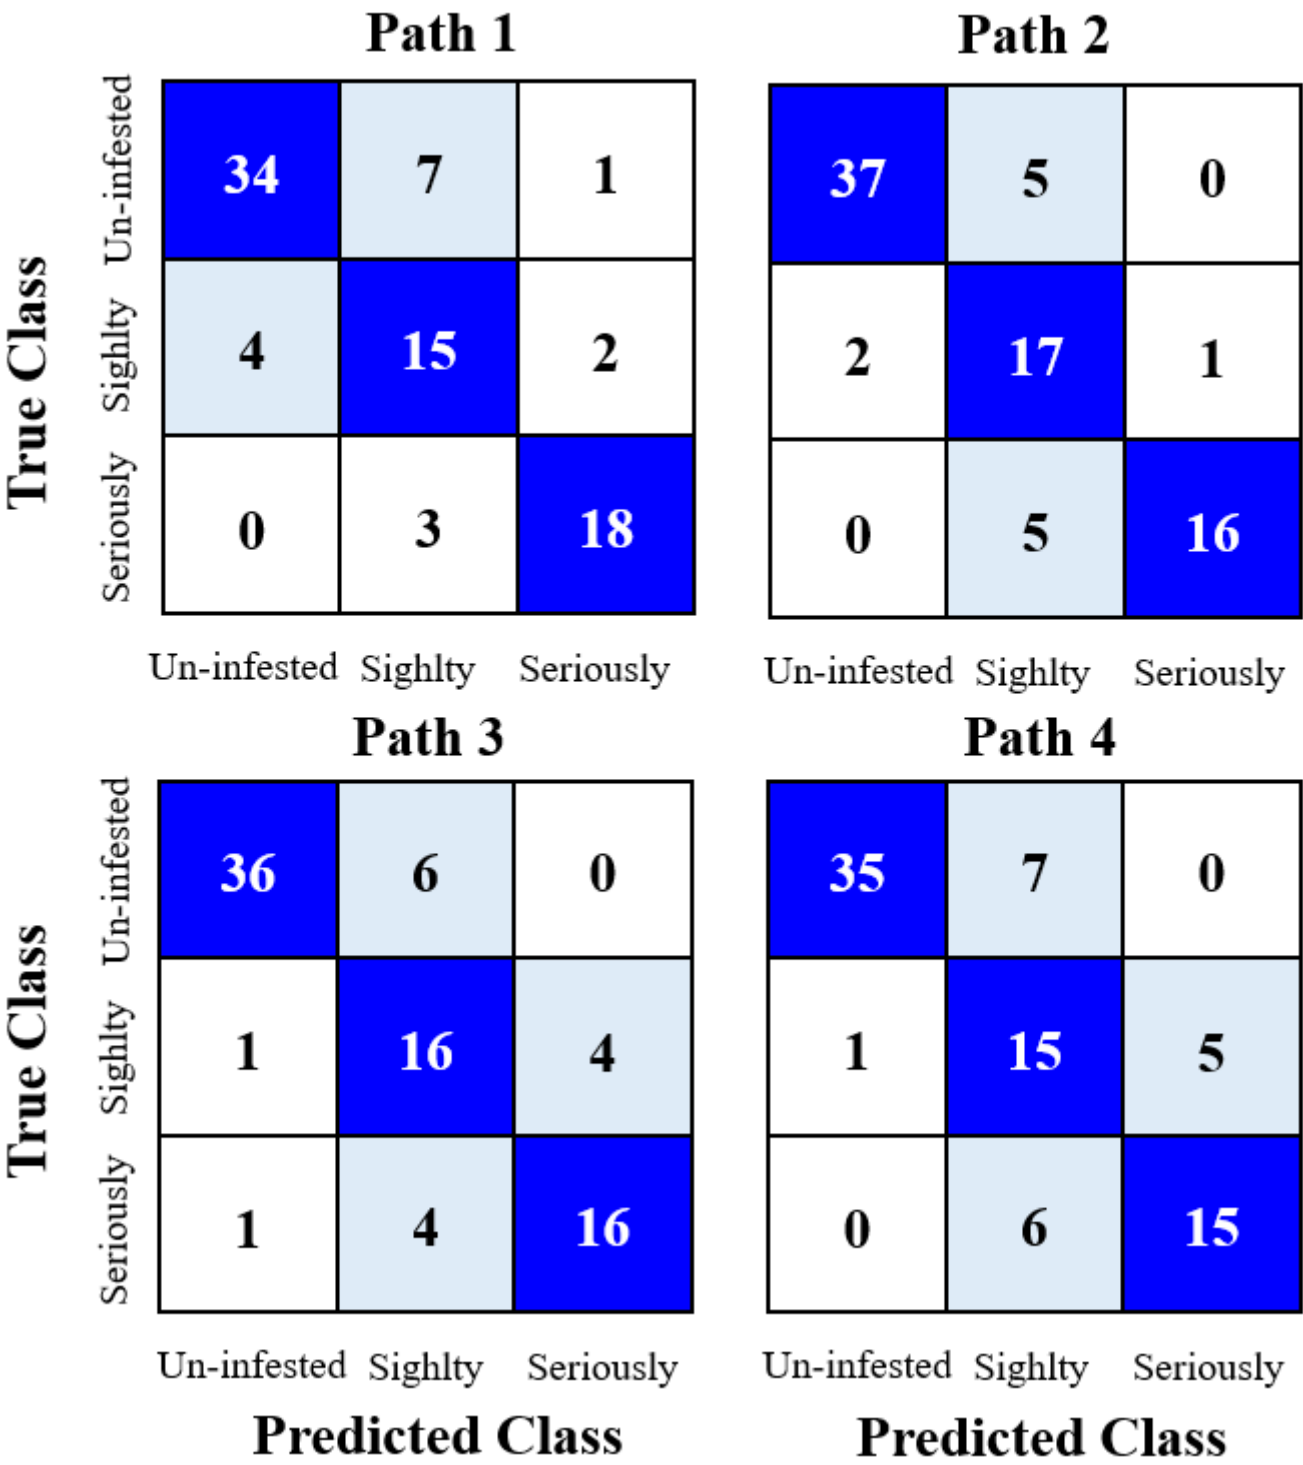

Figure S9

## Orientation C

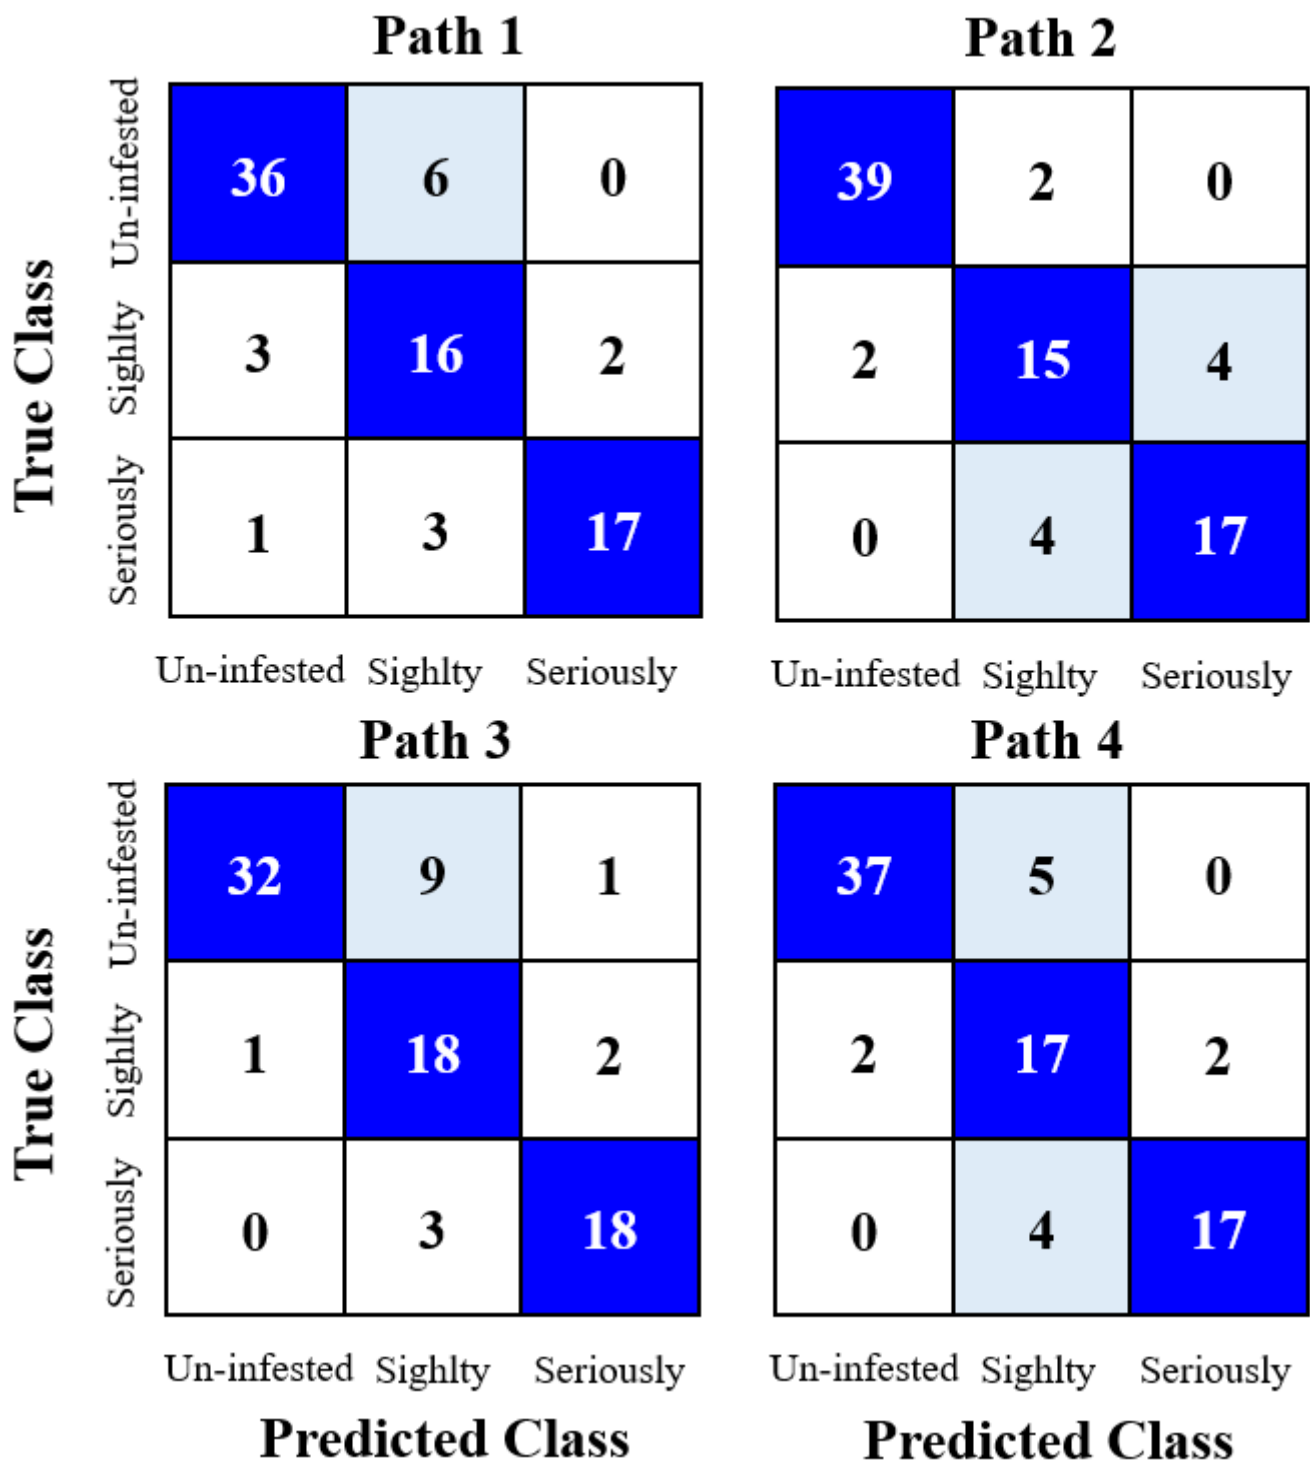

Figure S10

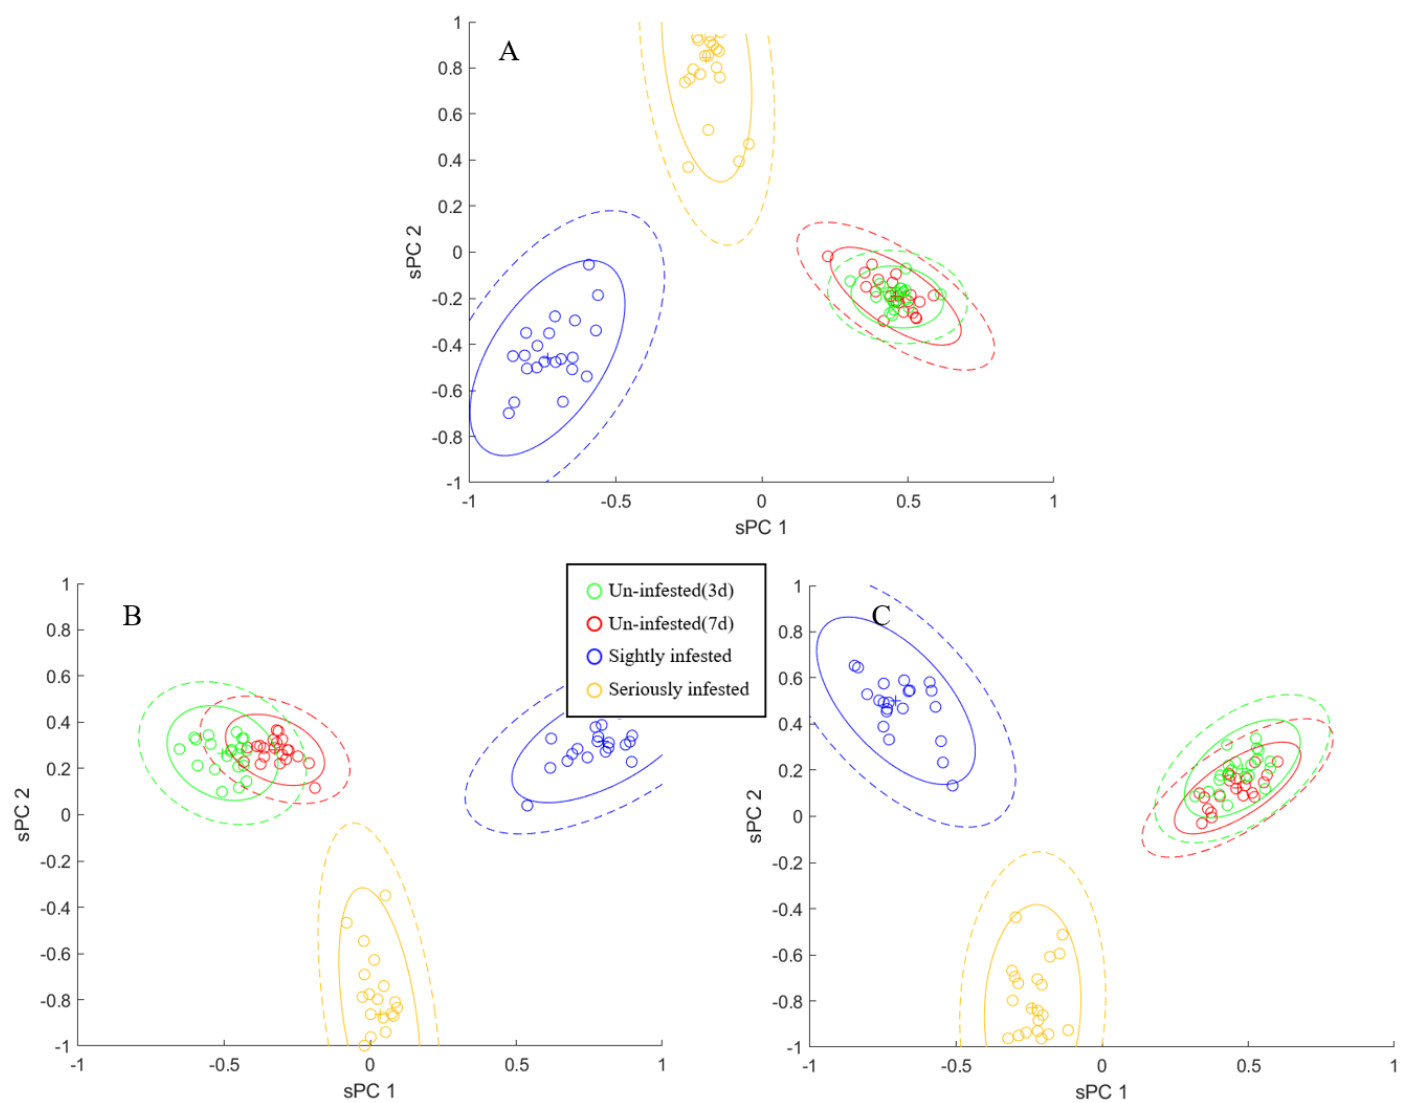

**Figure S11**

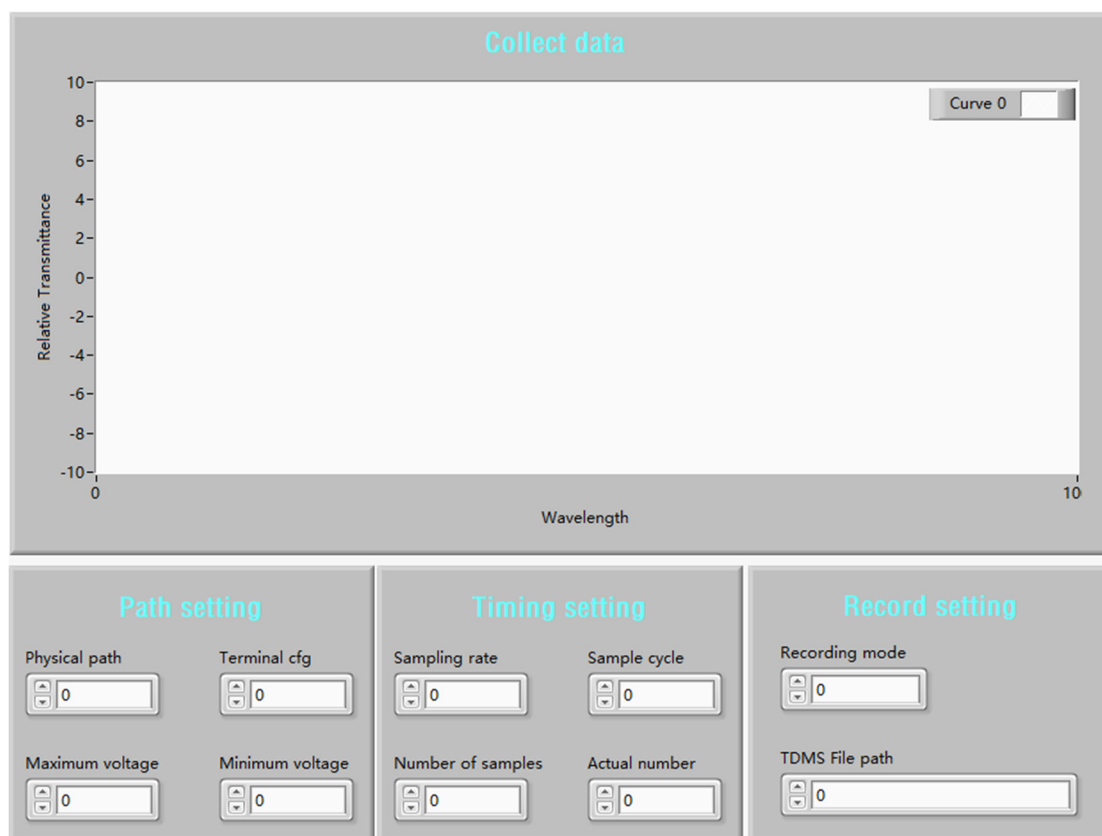

**Figure S12**

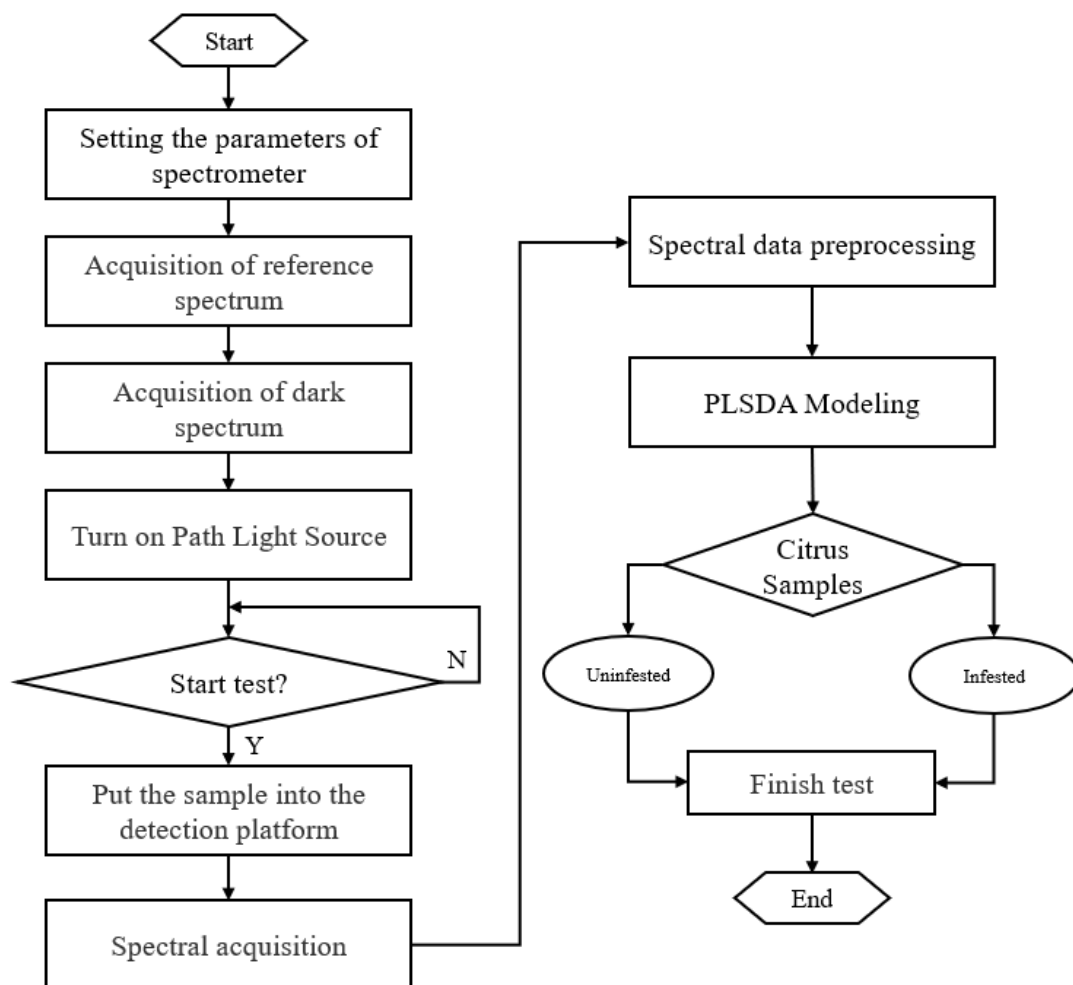

**Figure S13**

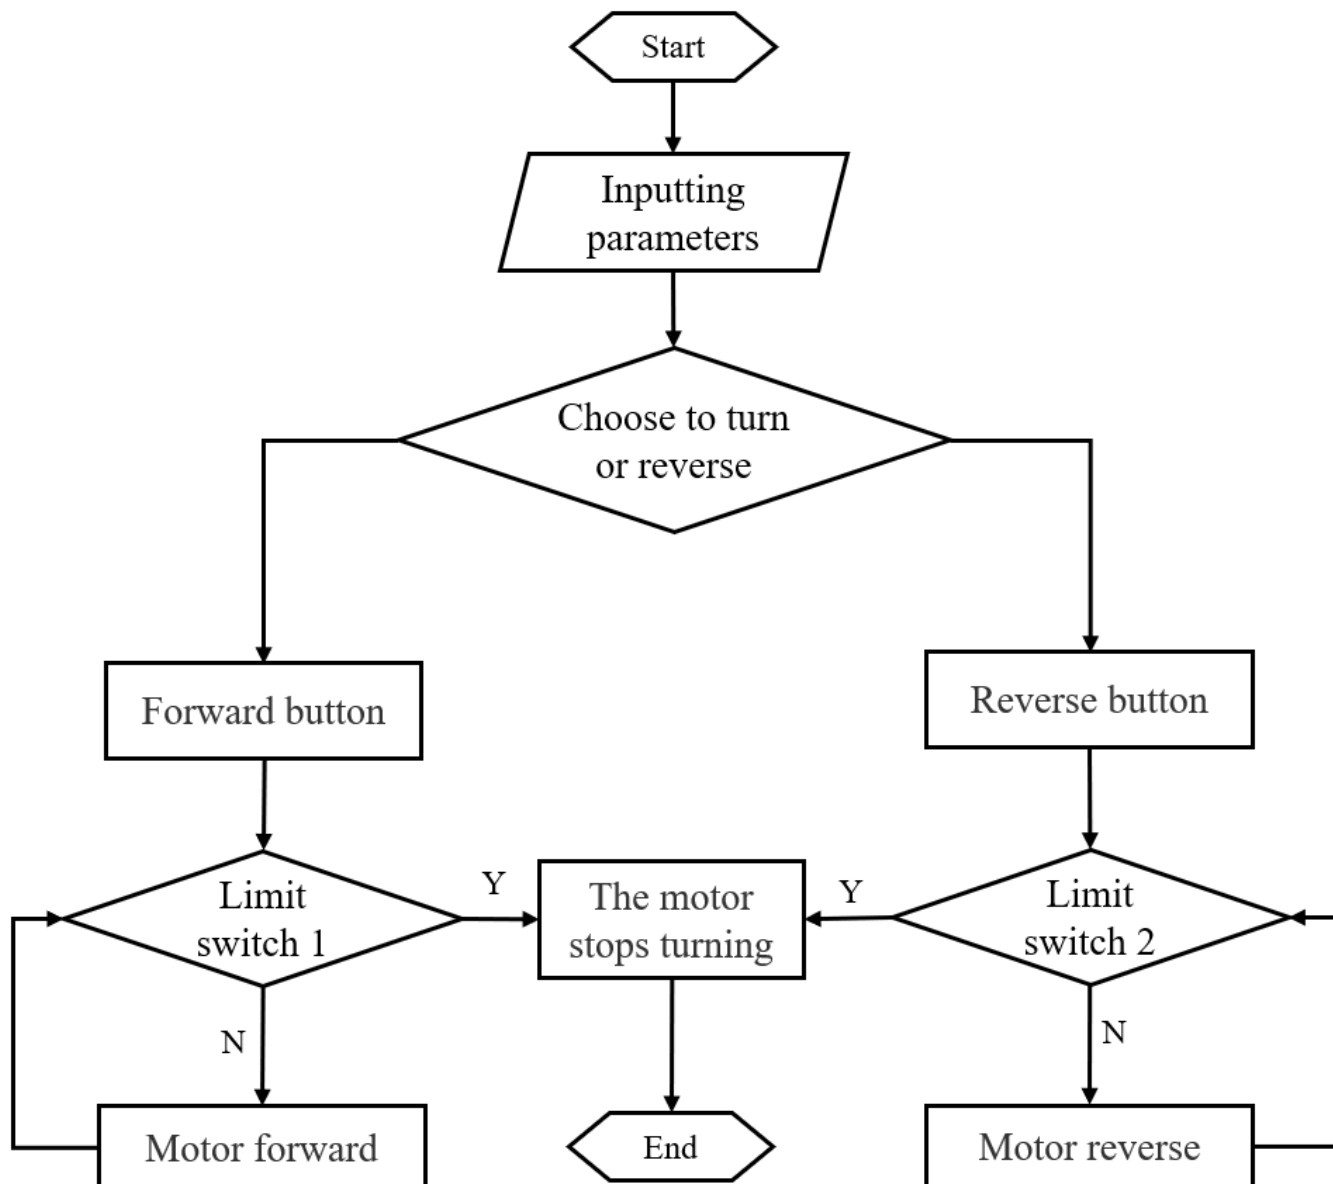

**Figure S14**
